# Supplementary material for: Bimodal high-affinity association of Brd4 with murine leukemia virus integrase and mononucleosomes
Source: PubMed Central journal article supplement (PMC4005663; doi:10.1093/nar/gku135), 2014-02-11

A

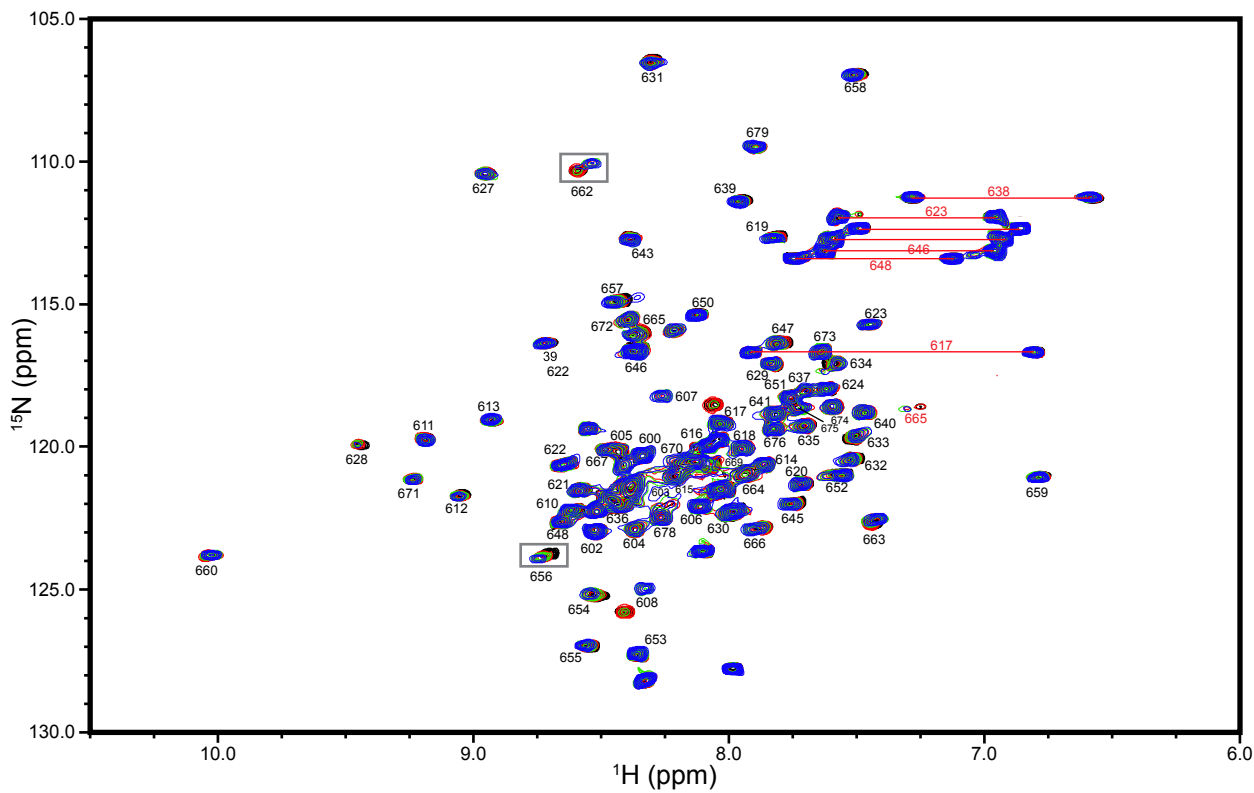

B

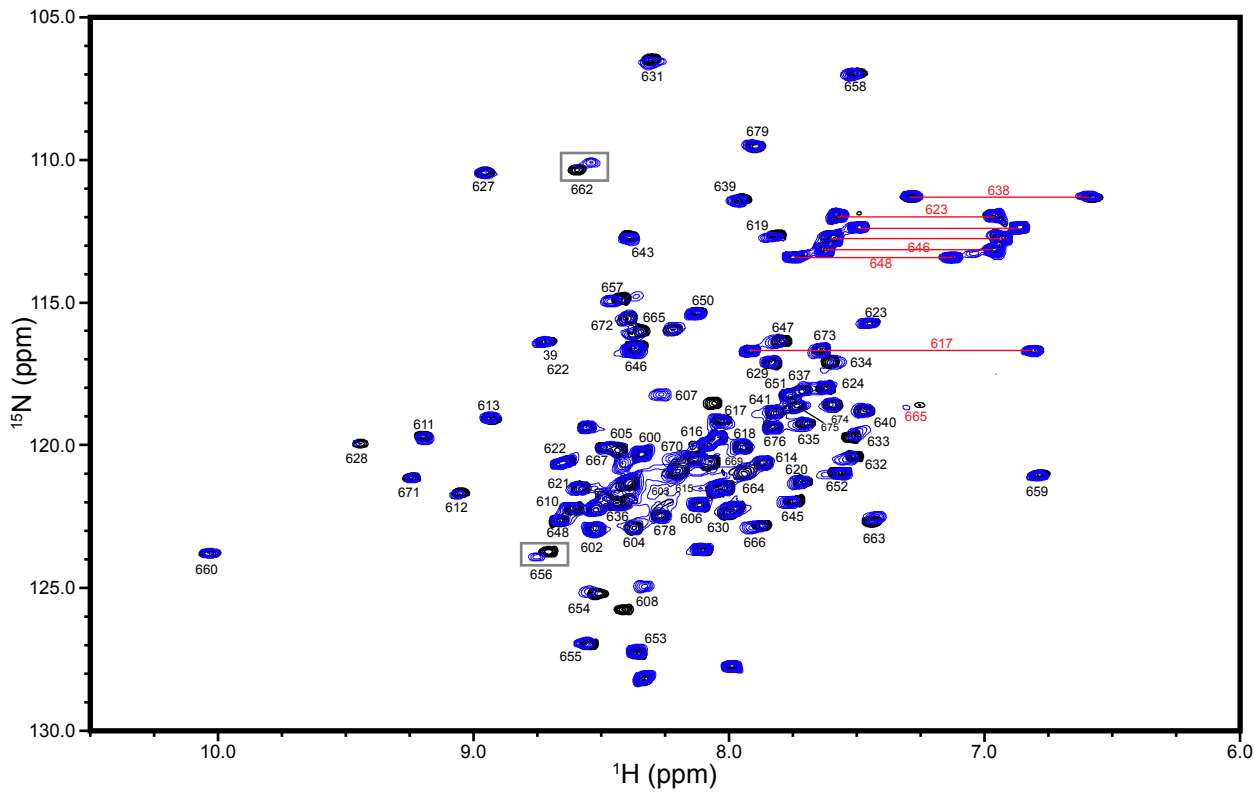

# Chemical Shift Perturbations on Brd4 ET domain induced by MLV CTD

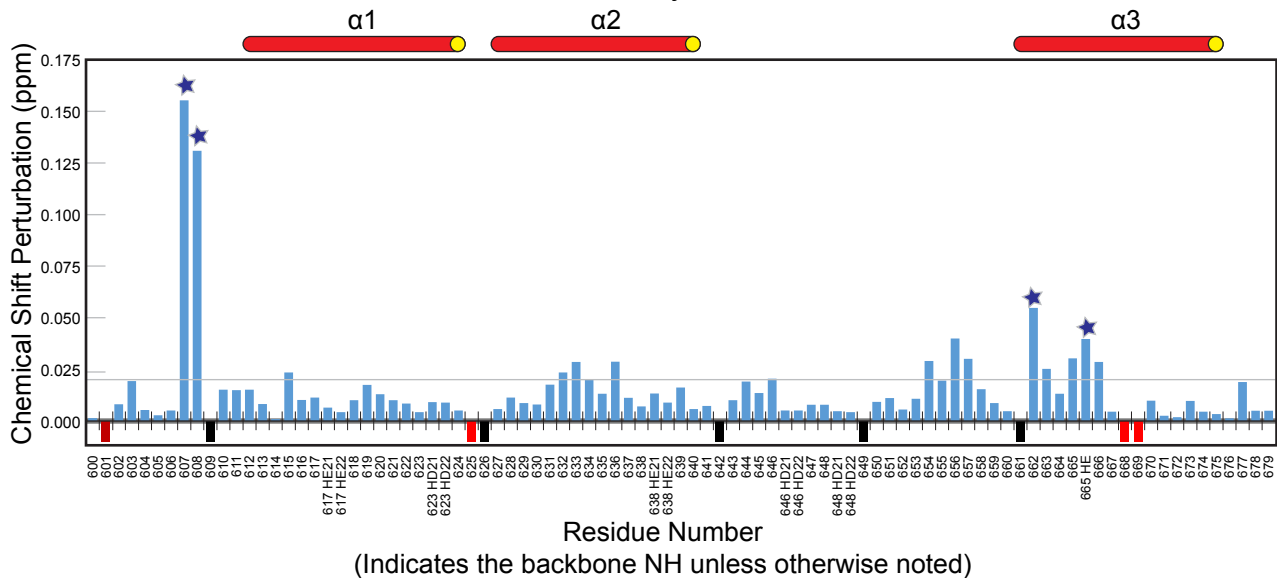

# Arg 665 sidechain H $\epsilon$

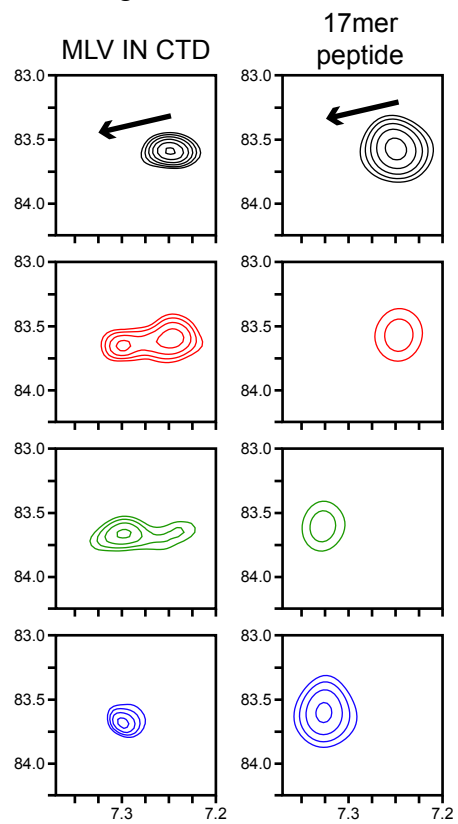

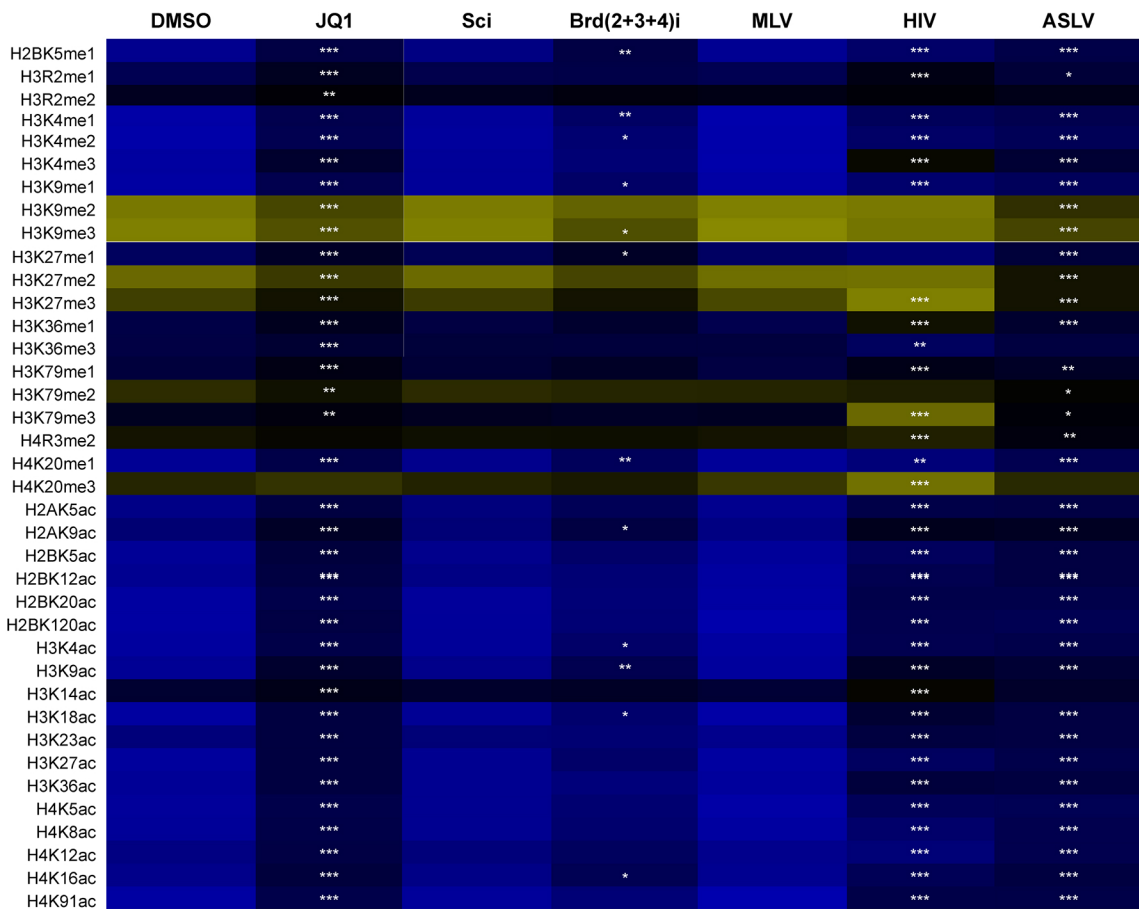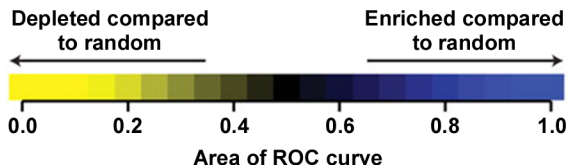

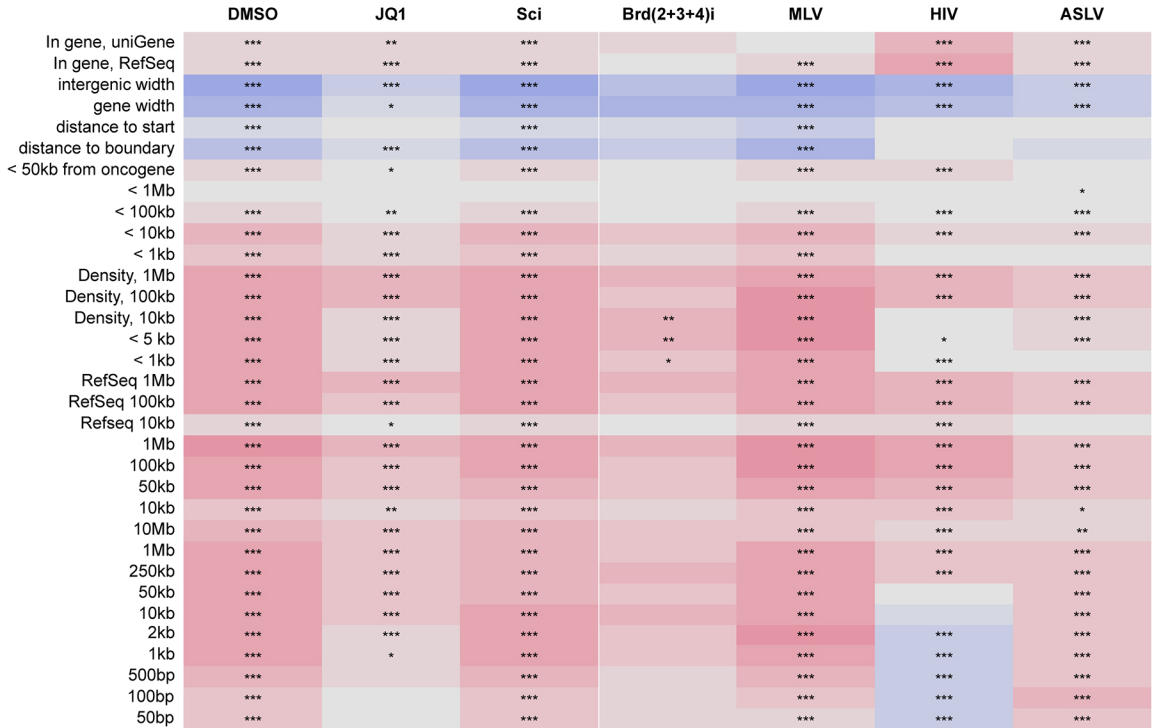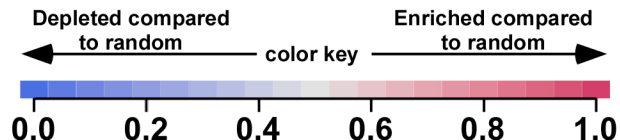

Supplement: supp_gku135_nar-03366-m-2013-File012.pdf [file supp_gku135_nar-03366-m-2013-File012.pdf]
